# Supplementary material for: Conduction band energy determination by variable temperature spectroelectrochemistry
Source: Royal Society of Chemistry journal article supplement (doi:10.1039/c2ee22926a), 2012-01-01
Supplement: c2ee22926a.pdf [file c2ee22926a.pdf]

## Conduction Band Energy Determination by Variable Temperature Spectroelectrochemistry

Jesse W. Ondersma and Thomas W. Hamann\*

Department of Chemistry, Michigan State University, East Lansing, Michigan 48823-1322.

### Supporting Information

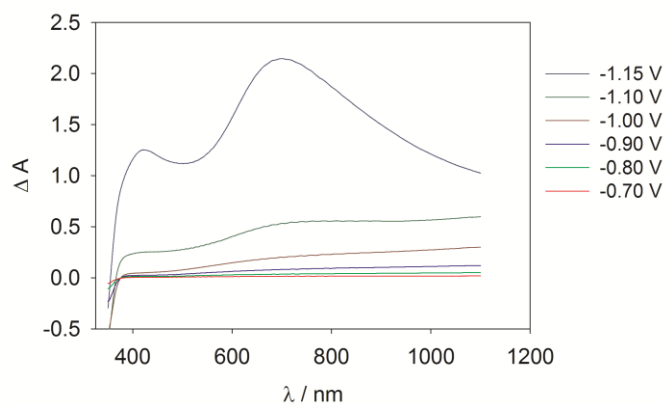

Figure SI1. Change in absorbance from the potentials listed to 0.5 V vs. Ag/AgCl.

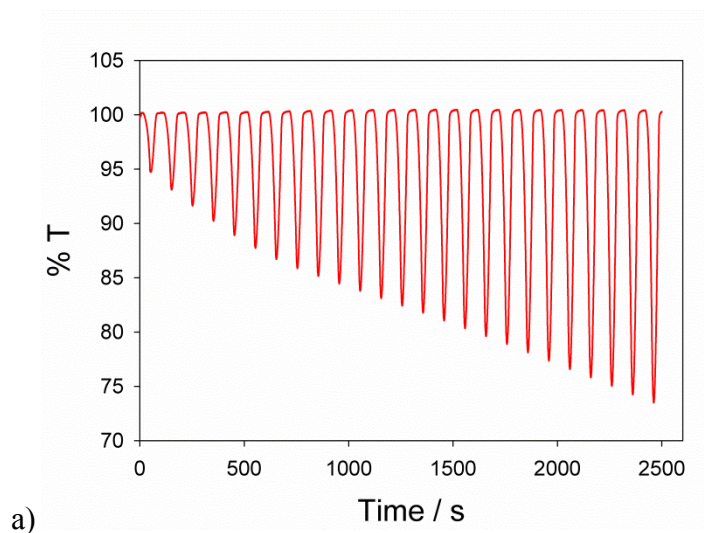

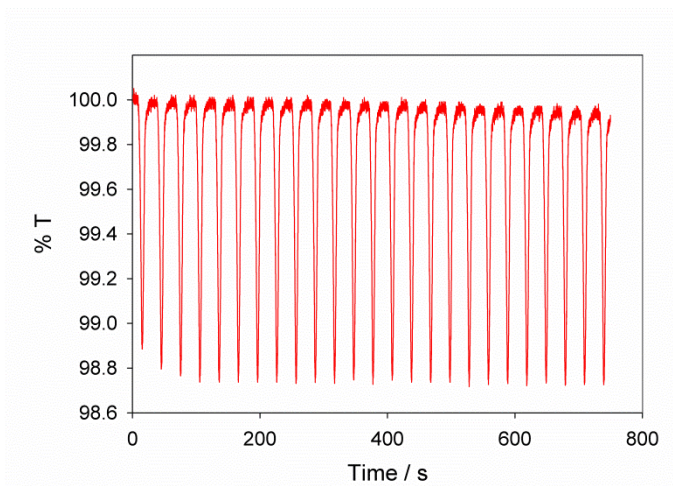

b)

Figure SI2. %T at 800 nm monitored while performing 25 cycles of cyclic voltammetry a) from 0.5 to  $-2$  V vs. Ag/AgCl at 0.05 V/s and b) from 0.5 to  $-1$  V vs. Ag/AgCl at 0.1 V/s.

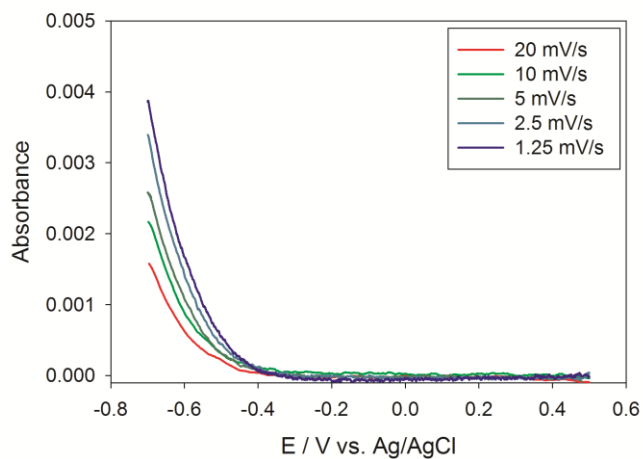

Figure SI3. Absorbance at 950 nm for a nanoparticle  $\text{TiO}_2$  film during cyclic voltammetry with several scan rates from 20 mV/s to 1.25 mV/s.
